# Supplementary material for: Overexpression of the essential Sis1 chaperone reduces TDP-43 effects on toxicity and proteolysis
Source: PubMed Central journal article supplement (PMC5460882; doi:10.1371/journal.pgen.1006805), 2017-05-22

S2A Fig

**[*pin*<sup>-</sup>]**

**[*PIN*<sup>+</sup>]**

**74D-694  
↑ TDP-43**

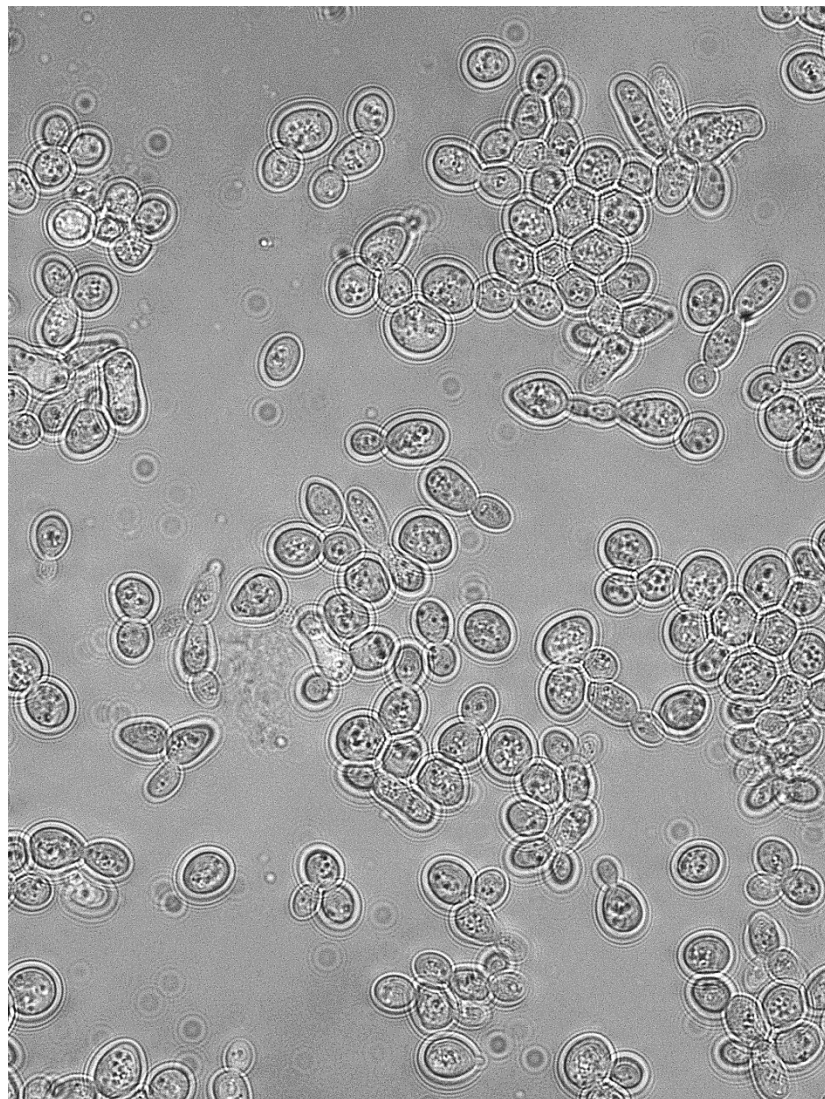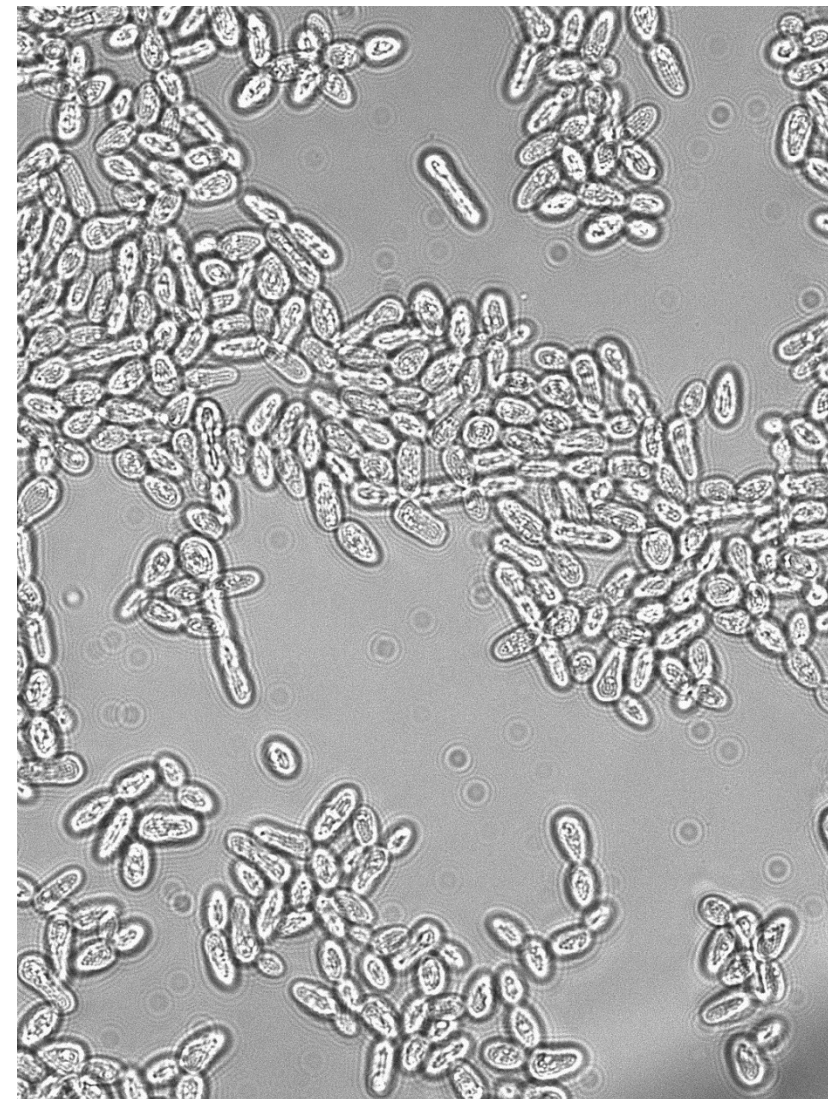

**74D-694  
vector**

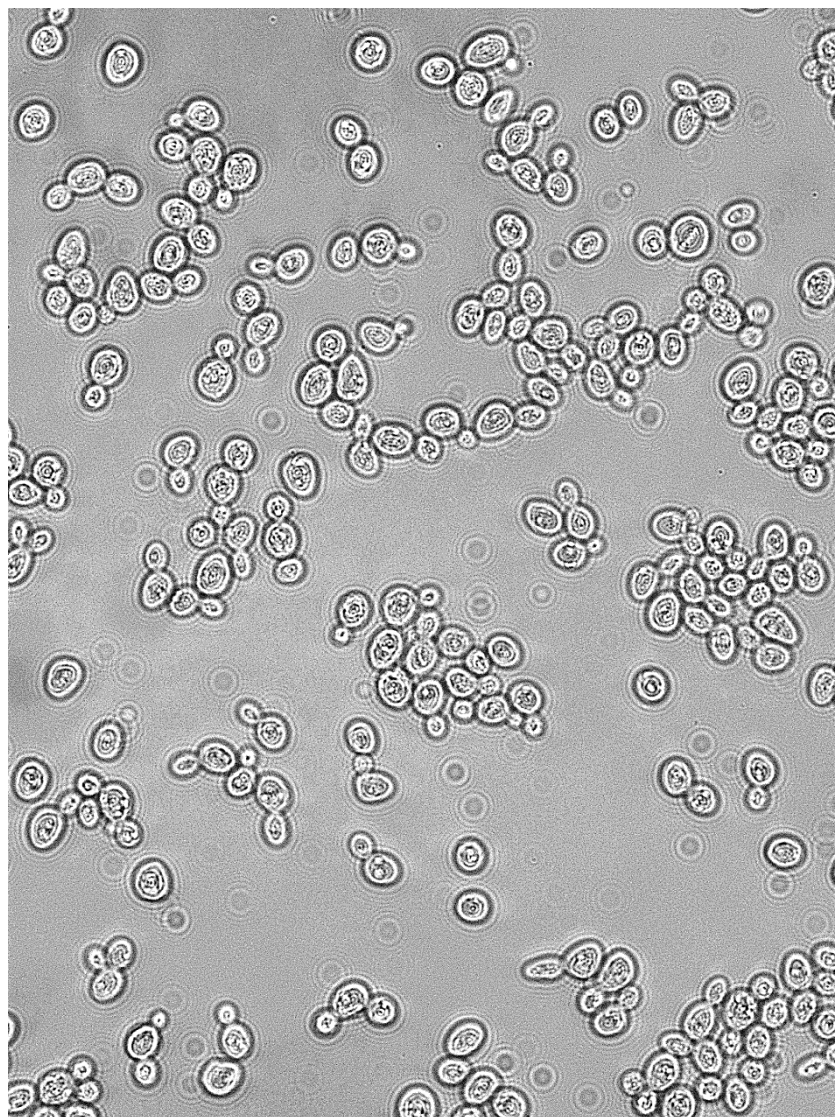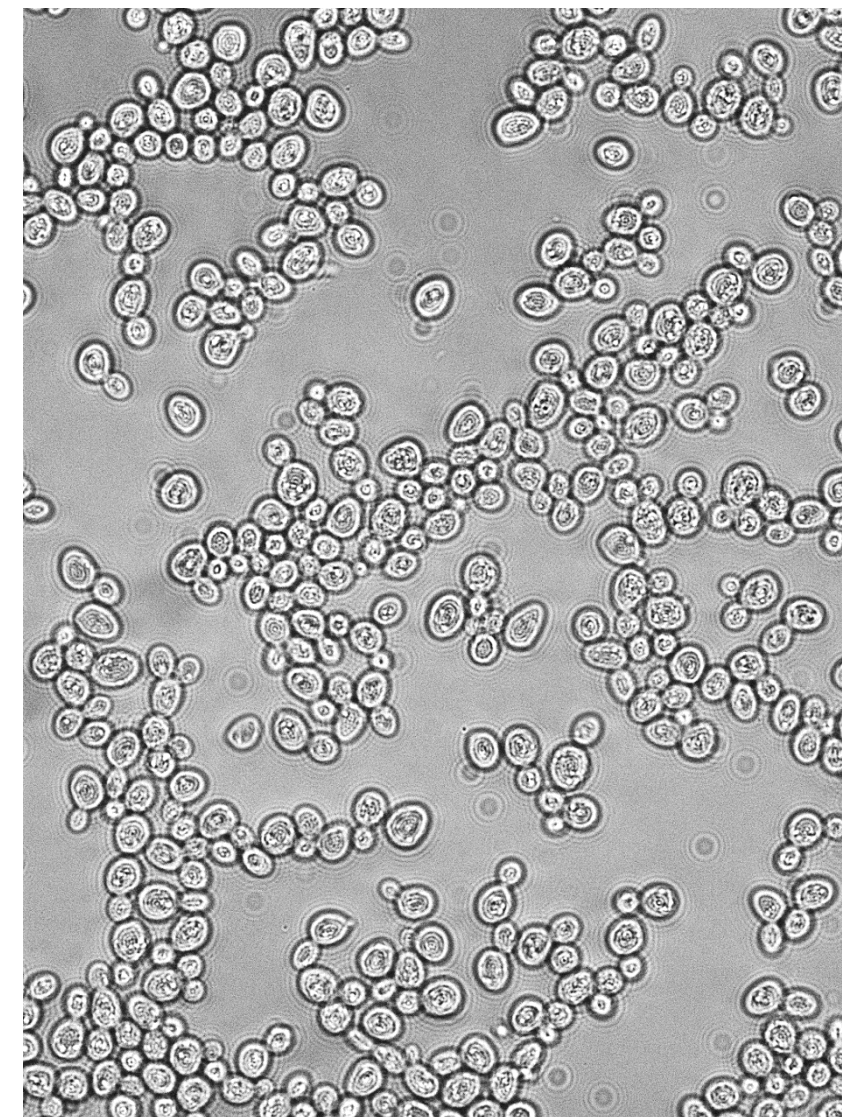



S2B Fig

*[pin<sup>-</sup>]*

*[PIN<sup>+</sup>]*

BY4741  
↑ TDP-43

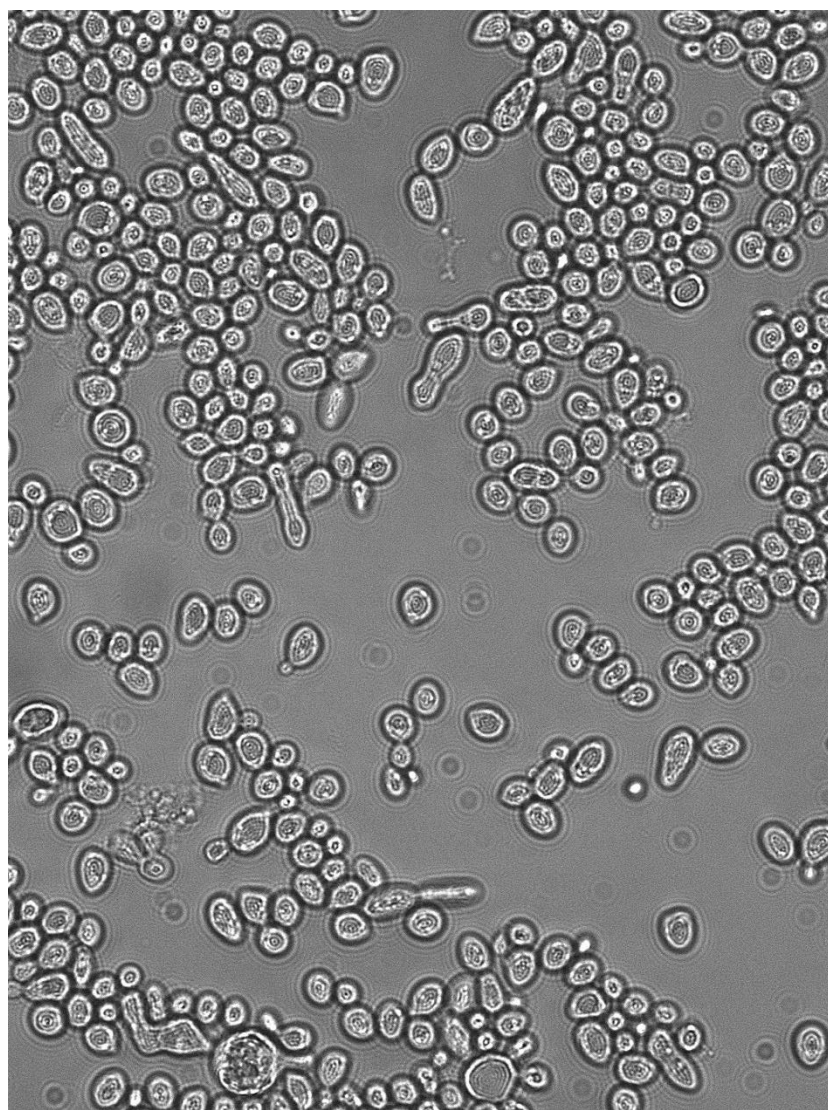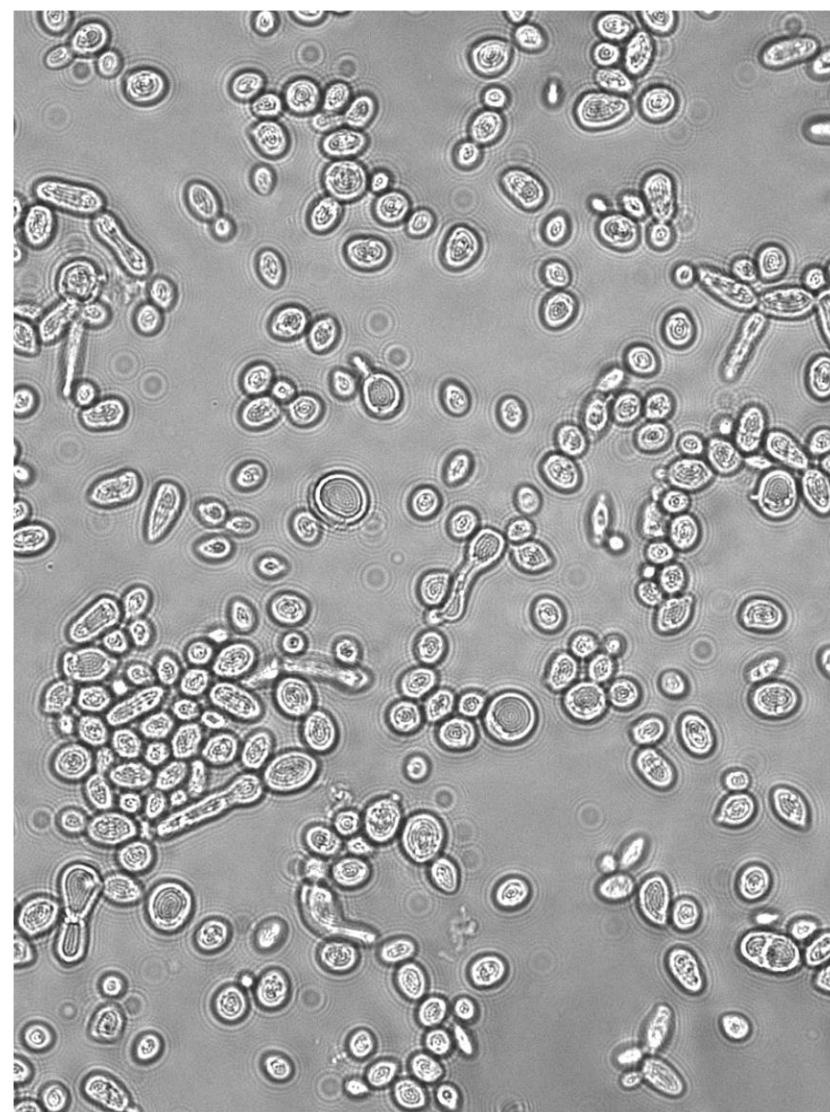

BY4741  
vector

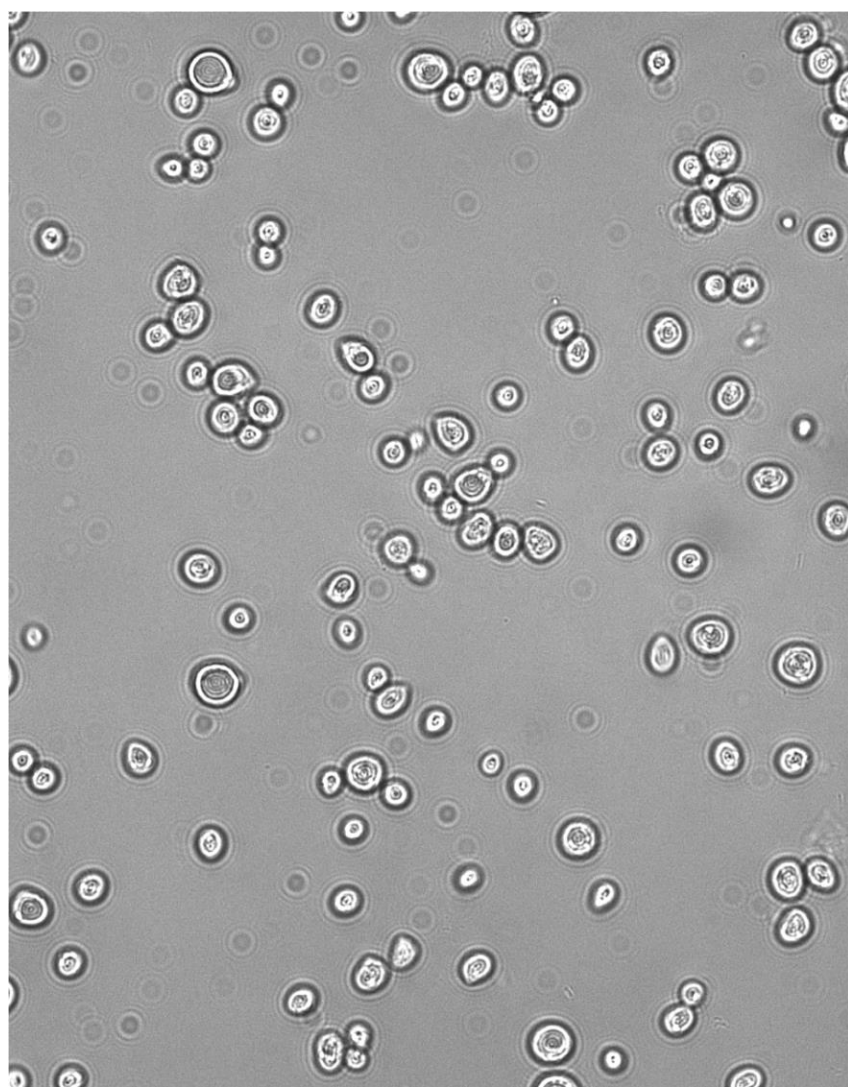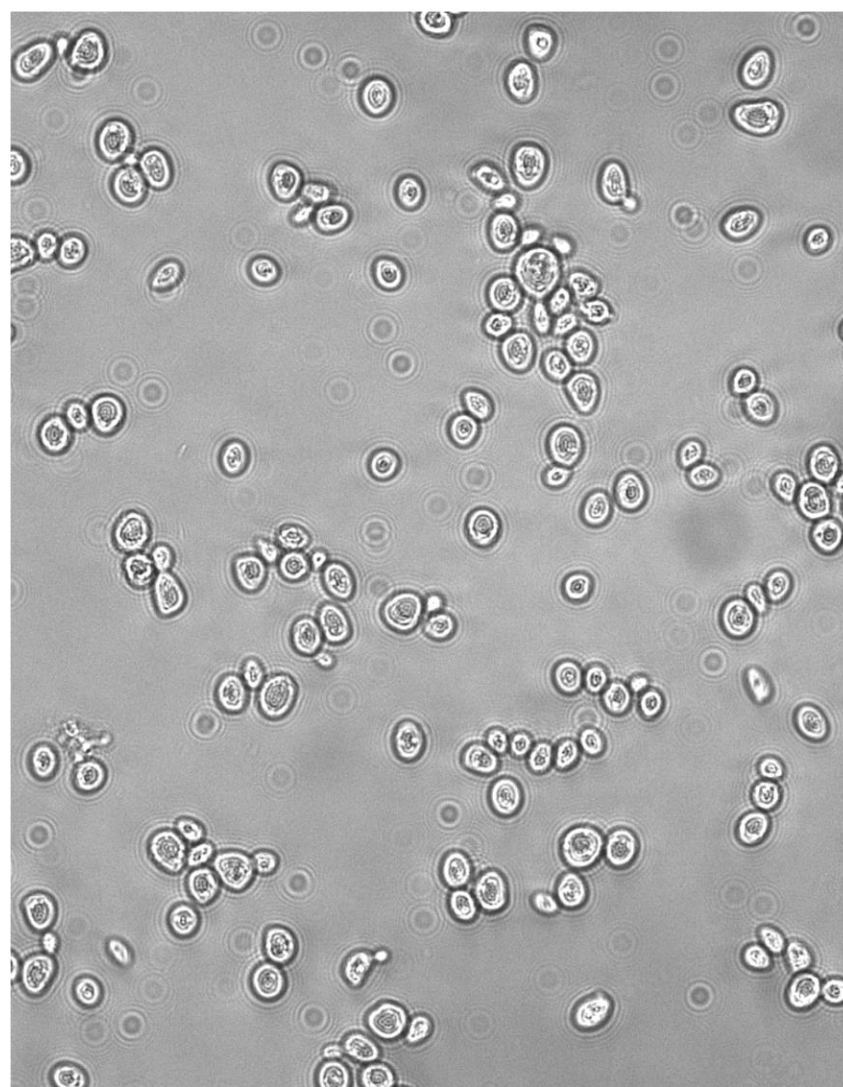



S2C Fig

**[*pin*<sup>-</sup>]**

**[*PIN*<sup>+</sup>]**

**W303**  
↑ **TDP-43**

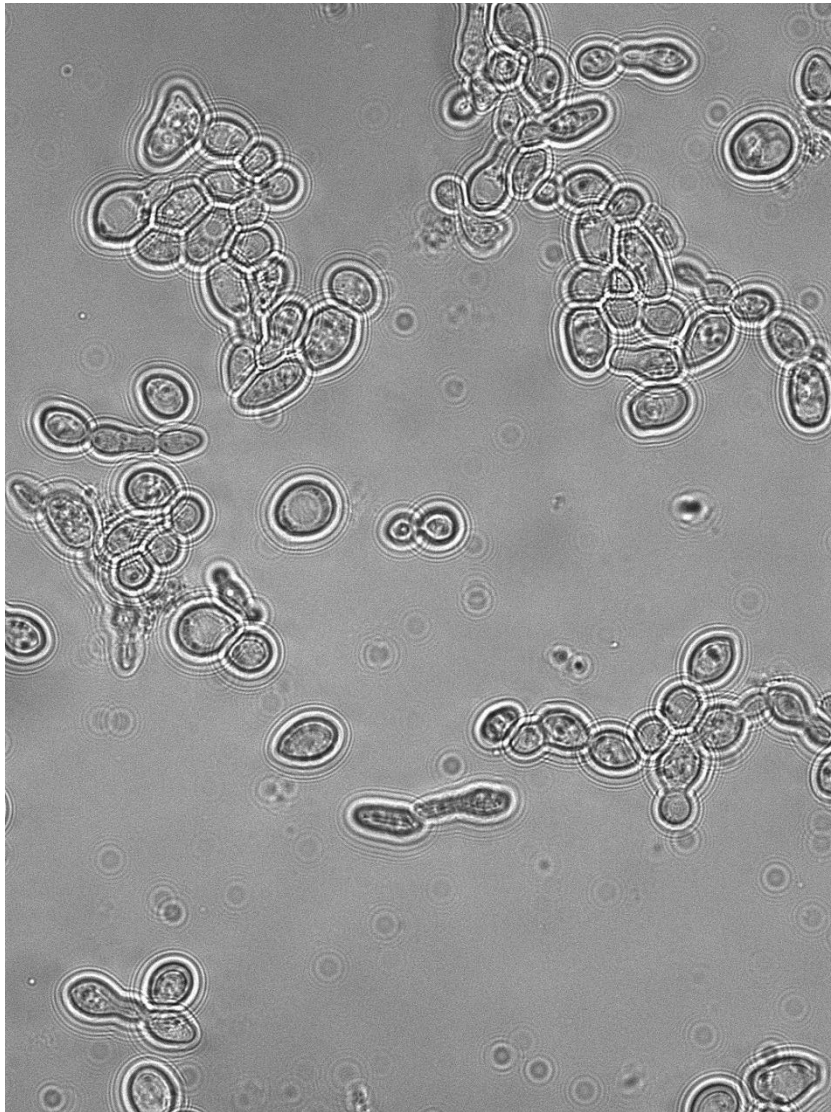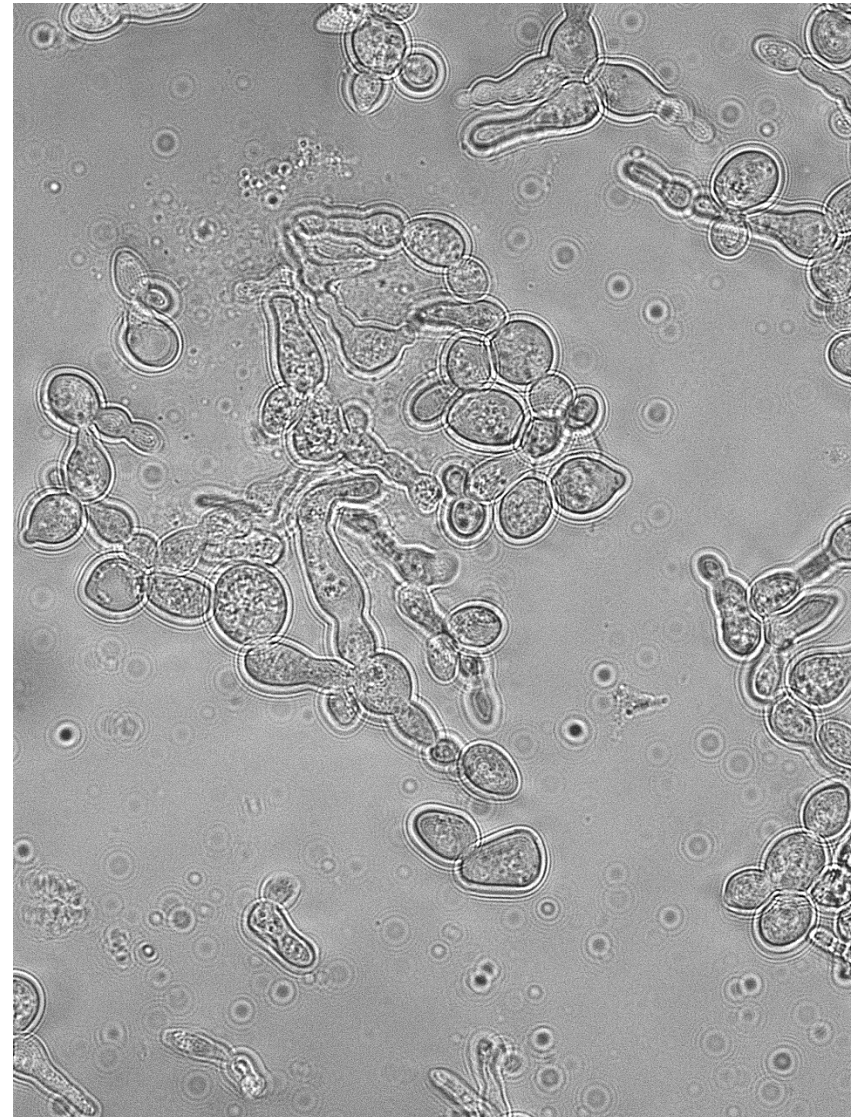

**W303**  
**vector**

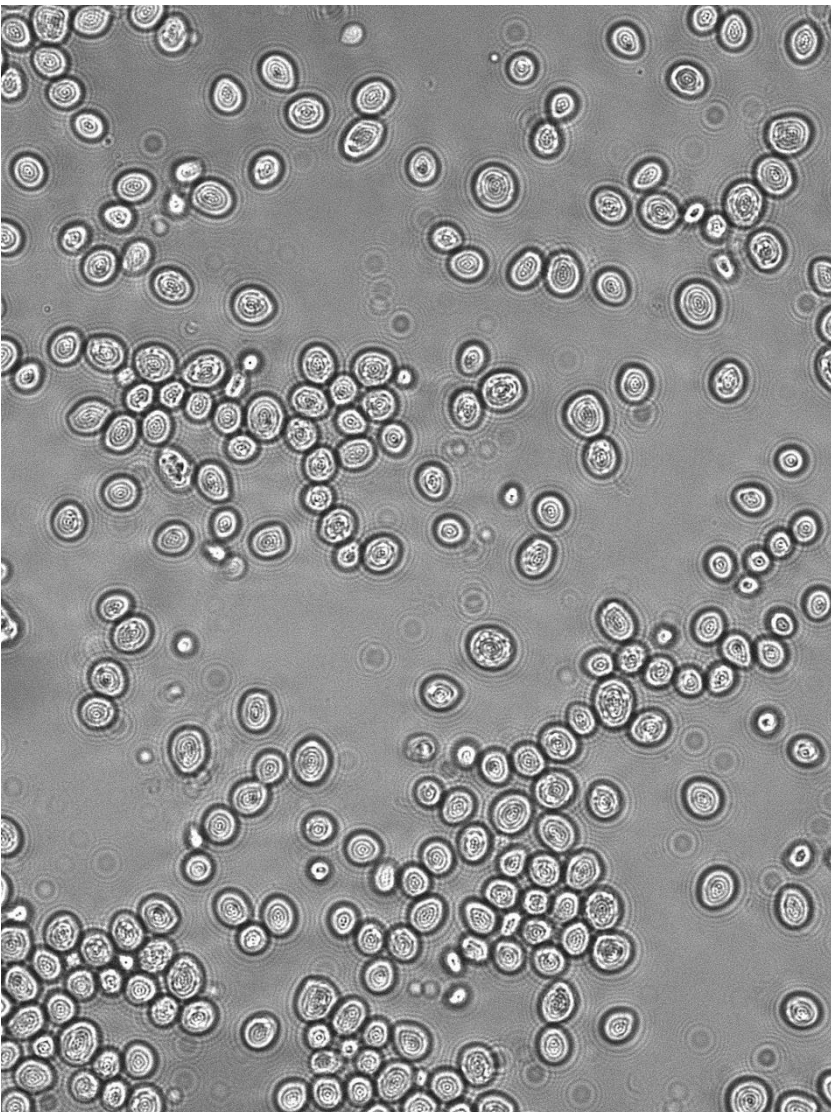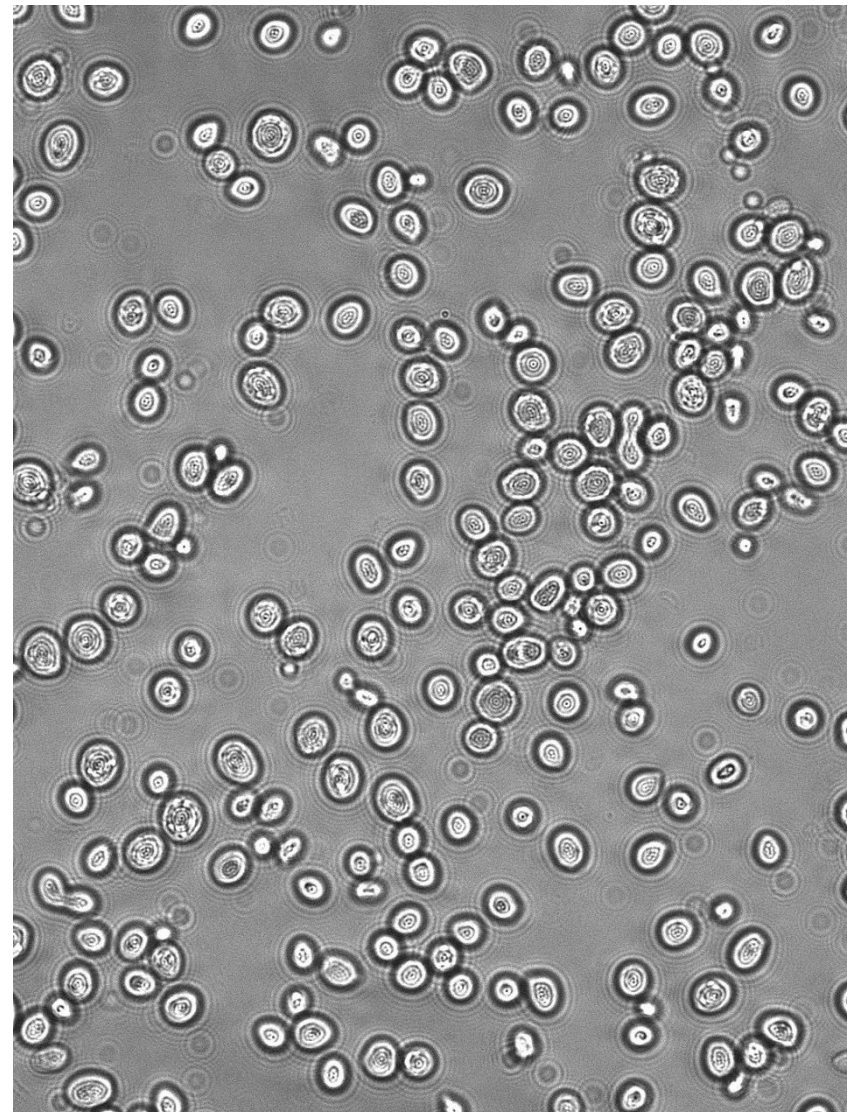

Supplement: pgen.1006805.s002.pdf [file pgen.1006805.s002.pdf]
