# Supplementary material for: Overexpression of the essential Sis1 chaperone reduces TDP-43 effects on toxicity and proteolysis
Source: PubMed Central journal article supplement (PMC5460882; doi:10.1371/journal.pgen.1006805), 2017-05-22

**S3 Fig**

**DOX:**

**0.5**

**0.05**

**0.01 ( $\mu\text{g/ml}$ )**

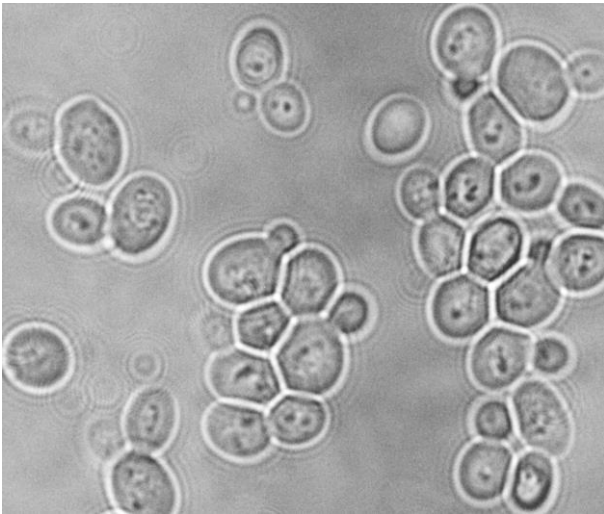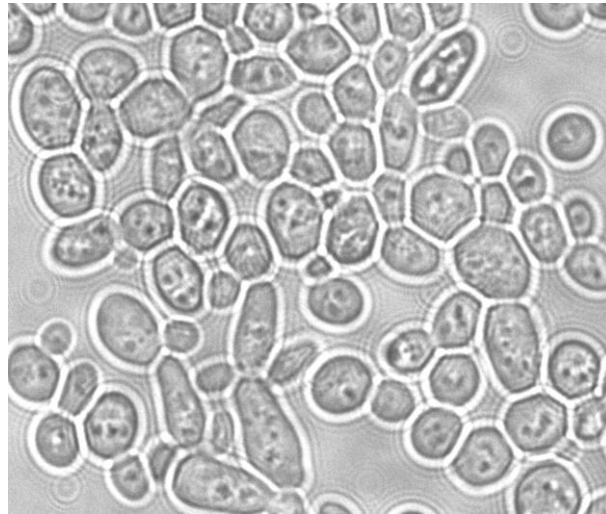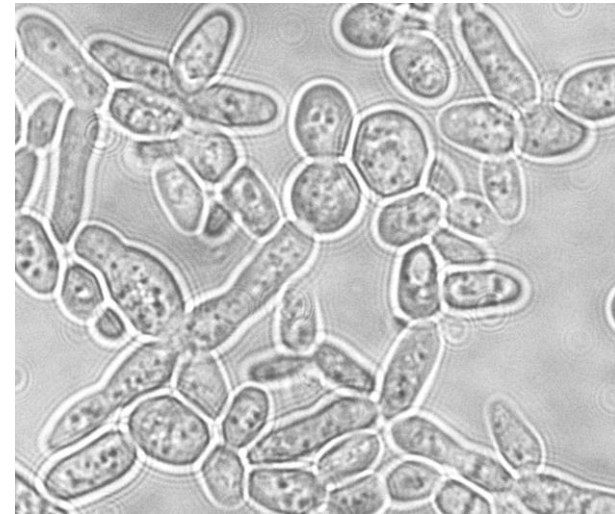

**$\alpha$ -TDP-43**

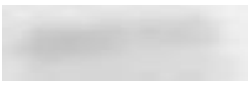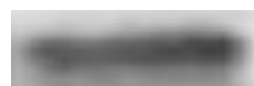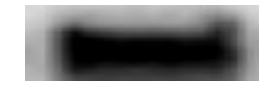

**$\alpha$ -PGK**

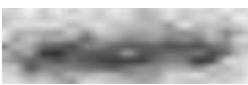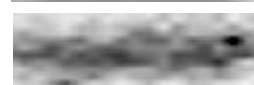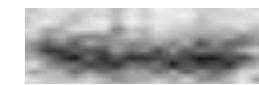

Supplement: pgen.1006805.s003.pdf [file pgen.1006805.s003.pdf]
