# Supplementary material for: Overexpression of the essential Sis1 chaperone reduces TDP-43 effects on toxicity and proteolysis
Source: PubMed Central journal article supplement (PMC5460882; doi:10.1371/journal.pgen.1006805), 2017-05-22

**S4 Fig**

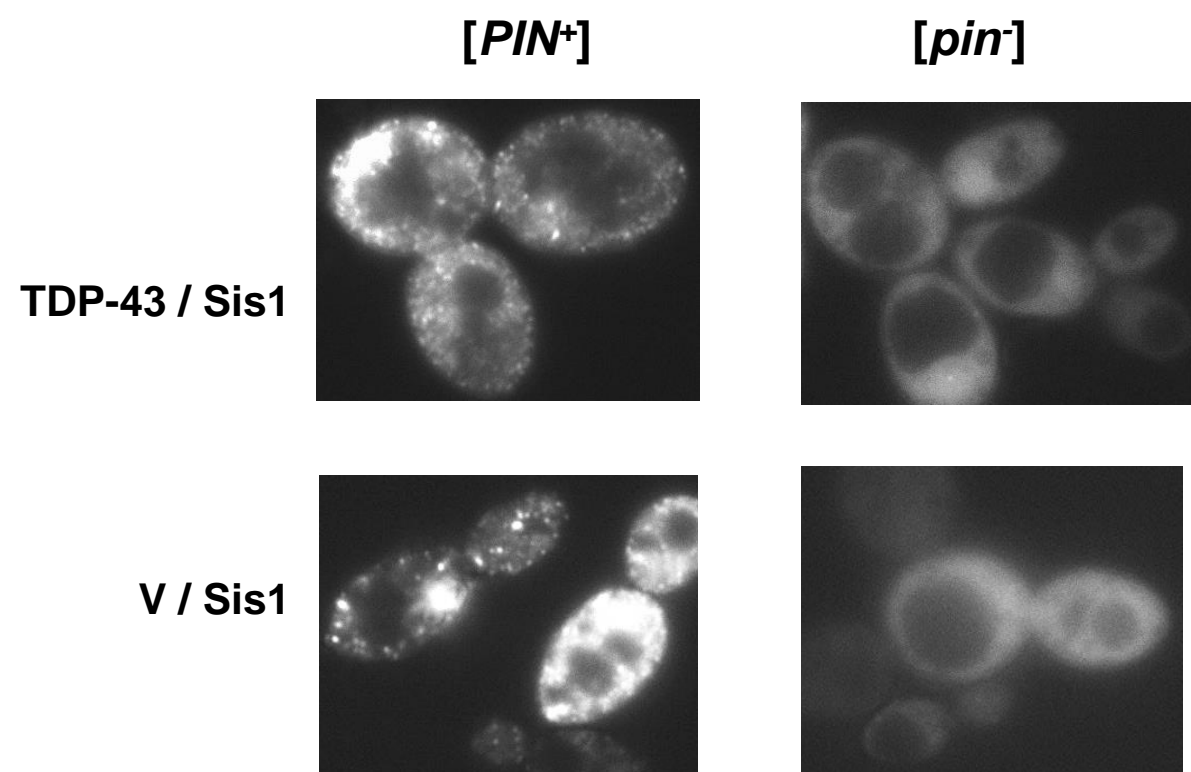

Supplement: pgen.1006805.s004.pdf [file pgen.1006805.s004.pdf]
